# Supplementary material for: Preclinical and Clinical Observations Implying Combination Therapy to Enhance the Efficacy of the Her-2/neu B-Cell Peptide-Based Vaccine HER-Vaxx and to Prevent Immune Evasion
Source: MDPI journal article supplement (doi:10.3390/ijms25010287), 2023-12-24
Supplement: s1 [file s1]

# Supplementary Materials

## Supplementary Table

**Table S1-** Details regarding primary antibodies, dilution, antigen retrieval, secondary antibodies, chromogen, and counterstain, used for the pathohistological assessments.

| Antibody                         | Dilution | Antigen retrieval                          | Detection System                                                                                                    | Immunostaining reagent            | Counterstain |
|----------------------------------|----------|--------------------------------------------|---------------------------------------------------------------------------------------------------------------------|-----------------------------------|--------------|
| <b>PDL1</b><br><b>CST#64988</b>  | 1: 200   | Heating in<br>citrate buffer<br><br>pH 6   | secondary antibody<br>conjugated to enzyme<br>labelled polymer<br><br>(Bright Vision Rabbit HRP<br>KL DPVR 110 HRP) | DAB (DAB Quanto<br>#_TA-125-QHDX) | hematoxylin  |
| <b>Her2</b><br><b>CST#2242</b>   | 1: 100   | Heating in<br>Tris-EDTA buffer<br><br>pH 9 | secondary antibody<br>conjugated to enzyme<br>labelled polymer<br><br>(Bright Vision Rabbit HRP<br>KL DPVR 110 HRP) | DAB (DAB Quanto<br>#_TA-125-QHDX) | hematoxylin  |
| <b>F4/80</b><br><b>CST#70076</b> | 1: 1000  | Heating in<br>citrate buffer<br><br>pH 6   | Strept-Avidin biotin<br>complex method with horse<br>radish peroxidase<br><br>(Abcam ab64269)                       | DB (DAB Quanto #<br>TA-125-QHDX)  | hematoxylin  |
| <b>CD79b</b><br><b>CST#96024</b> | 1: 250   | Heating in<br>Tris-EDTA buffer<br><br>pH 9 | secondary antibody<br>conjugated to enzyme<br>labelled polymer<br><br>(Bright Vision Rabbit HRP<br>KL DPVR 110 HRP) | DAB (DAB Quanto<br>#_TA-125-QHDX) | hematoxylin  |
